# Supplementary material
Source: PubMed Central journal article supplement (PMC4466714)
Supplement: pnas.201501327SI.pdf [file pnas.201501327SI.pdf]

# Supporting Information

Curtis et al. 10.1073/pnas.1501327112

## SI Materials and Methods

**Animals.** Mice with the gene *Bmal1* containing loxP sites at either side of exon 8 were obtained from Jackson Labs (stock no. 007668) and described in further detail below.

*Bmal1<sup>flox/flox</sup>* were crossed with *LysM<sup>cre/cre</sup>*, which express Cre recombinase under the control of the *LysozymeM* promoter to produce progeny that have BMAL1 excised in the myeloid lineage (monocytes, macrophages, and granulocytes). *Bmal1<sup>flox/flox</sup> Lys-MCre* were compared with littermate controls, *Bmal1<sup>+/+</sup> Lys-MCre*. Offspring were genotyped to confirm the presence of loxP sites and Cre recombinase. The following primers were used: primers for the detection of Cre recombinase—(Cre) 5' CCC AGA AAT GCC AGA TTA CG 3', (LysM1) 5' CTT GGG CTG CCA GAA TTT CTC 3', and (LysM2) 5' TTA CAG TCG GCC AGG CTG AC 3' (WT band 340 bp, CRE band 750 bp); primers for the detection of floxed *Bmal1*—5' AAT CAC CTT TTG GGG AGG AC-3', 5' TCA TCA GAG GAA CCA GGG TAA-3', and 5' CCC TGA ACA TGG GAA AGA GA-3' (WT band 320 bp, KO band 380 bp).

MiR-155<sup>-/-</sup> mice, in which exon 2 of MiR-155HG was replaced with a resistance cassette, were used as described (1).

**BMDMs.** Mice were euthanized by CO<sub>2</sub>, and cervical dislocation and the femur and tibia were isolated. BMDMs were isolated and differentiated as described (2). Before the experiment, cells were seeded at 1 × 10<sup>6</sup> cells per well in 10% (vol/vol) macrophage colony stimulating factor and allowed to rest overnight. LPS was then added at 100 ng/mL for specified times and harvested for RNA or protein analysis, and supernatants were harvested for ELISAs. To synchronize BMDMs, cells were serum-shocked (3). Cells were subjected to 50% (vol/vol) horse serum for 2 h, and then media were replaced with serum-free media and left for 30 h before stimulation with LPS.

**Bacterial Infections.** Bacterial infections were performed in the macrophage cell line RAW264. Cells were plated at 5 × 10<sup>5</sup> cells/mL. One day later, cells were infected with *E. coli* (1 × 10<sup>8</sup>/mL) or *Salmonella* U.K.1 (1 × 10<sup>4</sup>/mL). Twenty-four hours after infection, cells were harvested for RNA extraction.

**RNA Isolation and Gene Expression Analysis.** Total RNA was isolated using the miRNeasy mini kit (Qiagen) and transcribed using the High-Capacity cDNA Reverse Transcription Kit (Applied Biosystems). For mRNA, 18s ribosomal RNA or the RPS18 gene was used as a housekeeping control. For miRNA analysis, U6SNO was used as an internal control, and expression was analyzed as above. Target gene expression using Taqman probes (Applied Biosystems) was normalized to the housekeeping gene, and relative quantitation values were calculated using the  $\Delta\Delta C_t$  method.

**Protein Isolation, Western Blotting, and Densitometry.** Protein was extracted from cells using either T-PER lysis reagent (Pierce) or SDS loading buffer and loaded onto 8–10% (vol/vol) acrylamide gels. Protein was transferred onto a PVDF membrane and blocked with

5% milk for 1 h before incubation with primary antibody. Antibodies used were rabbit anti-BMAL1 (Bethyl Laboratories) and  $\beta$ -actin (4967) (Cell Signaling Technology) or Pan-Actin (4968) (Cell Signaling Technology), anti-Phospho-NF- $\kappa$ B p65 (Ser536) (3031) (Cell Signaling Technology), and total NF- $\kappa$ B p65 (L8F6) (6956), and all were used according to the manufacturers' recommendations. Signal was detected using the enhanced chemiluminescence reagent and imaged using the Geldoc system (Bio-Rad). Densitometry was performed on images using the ImageLab software from Bio-Rad.

**Human Endotoxemia Protocol.** As previously described (4–6), healthy volunteers, age 18–40 y, with body mass index of 18–30 kg/m<sup>2</sup> were recruited. Exclusions included inflammatory disease, pregnancy or medication, substance, or supplement use. Subcutaneous adipose samples were collected by core needle aspiration through a 4-mm gluteal incision from distinct sites 30 min before and after i.v. bolus of 3 ng/kg US standard reference endotoxin (LPS, lot no. CC-RE-LOT-1 + 2; Clinical Center, Pharmacy Department, National Institutes of Health) and stored at –80° C. A subset of study participants ( $n = 14$ ) was used for adipose tissue microarray as described (5, 6).

**hPBMC and Human Macrophages.** hPBMC isolation and macrophage differentiation was performed as described (7). Macrophages were then washed and treated with 100 ng/mL LPS for 4 h. Cells were then lysed for RNA isolation using TRIzol reagent (Invitrogen). Protein was extracted using RIPA lysis buffer with a proteinase inhibitor.

For transfections in hPBMCs, PBMC were isolated from whole blood using a Ficoll gradient and cultured in RPMI supplemented with 10% FCS, 2 mM L-glutamine, and 1% penicillin/streptomycin solution (vol/vol). Cells (2 × 10<sup>6</sup>) in 100  $\mu$ L Buffer V (Amaya Cell Line Nucleofector Kit V) were transfected with indicated amounts of the mir-155 antagomir using Amaya Nucleofector electroporation (Program Y-001, Version S3.4). Each sample was split into two wells containing prewarmed RPMI medium. After 24 h the cells were stimulated with LPS for 24 h. The cells were spun down and resuspended in 50  $\mu$ L of sample buffer (50 mM Tris Cl, pH 6.8/10% glycerol (vol/vol)/2% SDS (wt/vol)/0.1% bromophenol blue (wt/vol)/5% 2-mercaptoethanol). The samples were run on a 10% SDS-PAGE gel.

**Behavioral Monitoring in Mice.** Food and water were available ad libitum throughout all of the experiments, and temperature was 21 ± 1 °C and humidity was 50 ± 10%. For period length measurements, male and female wild-type controls ( $n = 9$ ) and MiR-155<sup>-/-</sup> ( $n = 14$ ; both 12 wk at the start of behavioral monitoring) were singly housed in cages equipped with a running wheel (1-cm diameter) and housed initially under a 12:12 light:dark cycle for 3 wk. After that animals were released in constant darkness for 4 wk, followed by constant light for another 4 wk. The average illumination at the cage level was 250 lx with lights on. Wheel-running activity was recorded with the Chronobiology Kit (Stanford System) and the Kit analyze software was used to run  $\chi^2$  periodogram analysis of the free-running rhythms.

1. Rodriguez A, et al. (2007) Requirement of bic/microRNA-155 for normal immune function. *Science* 316(5824):608–611.
2. Sheedy FJ, et al. (2010) Negative regulation of TLR4 via targeting of the proinflammatory tumor suppressor PDCD4 by the microRNA miR-21. *Nat Immunol* 11(2):141–147.
3. Balsalobre A, Damiola F, Schibler U (1998) A serum shock induces circadian gene expression in mammalian tissue culture cells. *Cell* 93(6):929–937.
4. Anderson PD, et al. (2007) Innate immunity modulates adipokines in humans. *J Clin Endocrinol Metab* 92(6):2272–2279.

5. Shah R, et al. (2012) Adipose genes down-regulated during experimental endotoxemia are also suppressed in obesity. *J Clin Endocrinol Metab* 97(11):E2152–E2159.
6. Shah R, et al. (2009) Gene profiling of human adipose tissue during evoked inflammation in vivo. *Diabetes* 58(10):2211–2219.
7. Ferguson JF, et al. (2012) Translational studies of lipoprotein-associated phospholipase A<sub>2</sub> in inflammation and atherosclerosis. *J Am Coll Cardiol* 59(8):764–772.

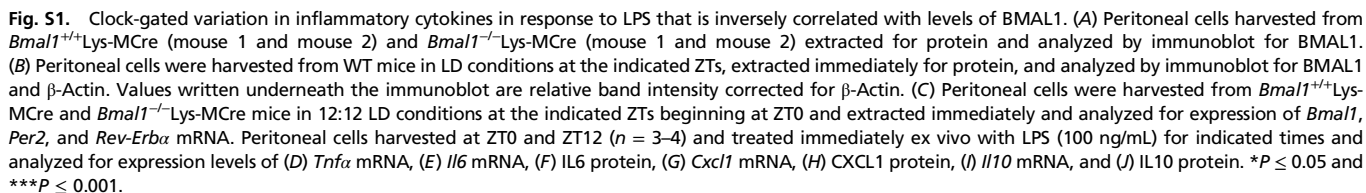

3 of 5
